# Supplementary material for: Identification of Volatile Sulfur Compounds Produced by Schizophyllum commune
Source: MDPI journal article supplement (doi:10.3390/jof7060465), 2021-06-08
Supplement: s1 [file s1]

**Table S1.** Fungal strains used in this study.

| Species                      | Strain<br>(IFM number) | Origin                             |
|------------------------------|------------------------|------------------------------------|
| <i>Schizophyllum commune</i> | 54711                  | BALF                               |
|                              | 54713                  | Sputum                             |
|                              | 54716                  | Not recorded (clinically isolated) |
|                              | 54717                  | BALF                               |
|                              | 54718                  | Ear discharge                      |
|                              | 54719                  | Not recorded (clinically isolated) |
|                              | 54720                  | Mucus plug                         |
|                              | 54721                  | Mucus plug                         |
|                              | 54722                  | Middle nasal meatus                |
|                              | 55609                  | Nasal discharge                    |
|                              | 55614                  | Sputum                             |
|                              | 56967                  | BALF/mucus plug                    |
|                              | 57114                  | Not recorded (clinically isolated) |
|                              | 57137                  | Not recorded (clinically isolated) |
|                              | 57149                  | BALF                               |
|                              | 57155                  | Not recorded (clinically isolated) |
|                              | 57162                  | Not recorded (clinically isolated) |
|                              | 57165                  | Not recorded (clinically isolated) |
|                              | 57462                  | Sputum                             |
|                              | 58008                  | BALF                               |
|                              | 58013                  | Mucus plug                         |
|                              | 58014                  | Mucus plug                         |
|                              | 58052                  | Mucus plug                         |
|                              | 58101                  | BALF                               |
|                              | 58102                  | BALF                               |
|                              | 58318                  | Mucus plug                         |
|                              | 58319                  | Mucus plug                         |
|                              | 58323                  | Sputum                             |
|                              | 58324                  | Sputum                             |
|                              | 58326                  | BALF                               |
|                              | 58333                  | BALF                               |
|                              | 59086                  | Not recorded (clinically isolated) |
|                              | 59343                  | BALF                               |
|                              | 59347                  | Paranasal sinus                    |
|                              | 59348                  | Not recorded (clinically isolated) |
|                              | 59499                  | BALF                               |
|                              | 59695                  | Lung                               |
|                              | 59773                  | Unknown                            |
|                              | 60198                  | Sputum                             |
|                              | 60277                  | Peach (Ehime)                      |
|                              | 60278                  | Environment (Tokyo)                |
|                              | 60279                  | Environment (Kyoto)                |

|                              |       |                                        |
|------------------------------|-------|----------------------------------------|
|                              | 60280 | Environment (Fukushima)                |
|                              | 60281 | Environment (Ibaraki)                  |
|                              | 60282 | Environment (Miyagi)                   |
|                              | 60283 | Environment (Okinawa)                  |
|                              | 60284 | Pear ( <i>Pyrus pyrifolia</i> ) (Saga) |
|                              | 60285 | Common grape vine (Ibaraki)            |
|                              | 60286 | Apple (Aomori)                         |
| <i>Aspergillus fumigatus</i> | 49824 | BAL from ABPA patient                  |
|                              | 49895 | Lung                                   |
|                              | 51748 | Sputum                                 |
|                              | 51941 | Suction phlegm                         |
|                              | 55369 | Lung                                   |
|                              | 59777 | Fungus ball in lung                    |
| <i>Aspergillus niger</i>     | 49437 | Trachea                                |
|                              | 49718 | Sputum                                 |
|                              | 54606 | Unknown                                |
|                              | 57352 | Unknown                                |
|                              | 58160 | Unknown                                |
| <i>Aspergillus flavus</i>    | 50915 | Lung                                   |
|                              | 55547 | Bronchoscope brushing                  |
|                              | 56753 | Lung                                   |
|                              | 57166 | Unknown                                |

---

BALF: bronchoalveolar lavage fluid.

**Table S2.** Abundance of polysulfides produced by *S. commune*.

| Strain (IFM number) | Peak area |          |          |          |          |
|---------------------|-----------|----------|----------|----------|----------|
|                     | DMS       | MES      | DES      | DMTris   | DMTetraS |
| 54711               | 132204    | 2044090  | 4253497  | 15030    | ND       |
| 54713               | 38917     | 89506    | 35547    | ND       | ND       |
| 54716               | 100723    | 472114   | 264251   | ND       | ND       |
| 54717               | 594394    | 1653646  | 757664   | 70255    | ND       |
| 54718               | 54534250  | 671145   | ND       | 1130881  | 6785     |
| 54719               | 223127    | 934322   | 457274   | 65500    | ND       |
| 54720               | 135820    | 741499   | 437060   | 33830    | ND       |
| 54721               | 184596    | 2614023  | 4839444  | 96969    | ND       |
| 54722               | ND        | 926270   | 1280432  | ND       | ND       |
| 55609               | 229329    | 1363163  | 1055547  | ND       | ND       |
| 55614               | 958182    | 38026    | ND       | 56284    | ND       |
| 56967               | 71704718  | 4010629  | 75165    | 26856809 | 1129212  |
| 57114               | 6001930   | 12334243 | 2358861  | 2058957  | 29367    |
| 57137               | 288164    | 1104790  | 1044665  | 87271    | 2419     |
| 57149               | 106005    | 656610   | 631083   | ND       | ND       |
| 57155               | 12014586  | 15219097 | 1781985  | 8226981  | 477945   |
| 57162               | 20773366  | 274630   | ND       | 2331450  | 37002    |
| 57165               | 48626     | 294028   | 197725   | ND       | ND       |
| 57462               | 2314596   | 20955182 | 17631918 | 223649   | ND       |
| 58008               | 160342    | 1624691  | 1946920  | 71271    | 4545     |
| 58013               | 557254    | 6685949  | 9874627  | 929325   | 92924    |
| 58014               | 1014664   | 5866972  | 3880398  | 1035227  | 41603    |
| 58052               | 48976     | 100063   | ND       | ND       | ND       |
| 58101               | 408156    | 6791557  | 13533691 | 252177   | 16470    |
| 58102               | 101774    | 1069331  | 1350632  | ND       | ND       |
| 58318               | 115472    | 796821   | 690827   | ND       | 2774     |

|       |          |          |          |          |         |
|-------|----------|----------|----------|----------|---------|
| 58319 | 2779759  | 19614493 | 9239701  | 2341097  | 166183  |
| 58323 | 18871727 | 11463235 | 733077   | 10364417 | 354902  |
| 58324 | 6582306  | 2647209  | 176957   | 1924433  | 60058   |
| 58326 | 25050815 | 12730898 | 854293   | 3600431  | 161168  |
| 58333 | 353540   | 747600   | 291333   | 29316    | ND      |
| 59086 | 6913229  | 115973   | ND       | 1417057  | 13634   |
| 59343 | 4914089  | 16772609 | 5803659  | 5118986  | 255316  |
| 59347 | 91310981 | 50877226 | 5053172  | 37296338 | 3377840 |
| 59348 | 18616312 | 3079694  | ND       | 7525293  | 385499  |
| 59499 | 345518   | 3727906  | 4520442  | 153176   | 6479    |
| 59695 | 7514307  | 26782879 | 12020516 | 3430772  | 94089   |
| 59773 | 137204   | 862349   | 595472   | 29147    | ND      |
| 60198 | 26977214 | 256326   | 4594     | 1102210  | 10295   |
| 60277 | 15435370 | 204213   | ND       | 2211150  | 34856   |
| 60278 | 13218015 | 170514   | ND       | 930857   | 14155   |
| 60279 | 18174669 | 495377   | ND       | 1236788  | 14297   |
| 60280 | 18398269 | 563981   | ND       | 8587442  | 68323   |
| 60281 | 20711511 | 213136   | ND       | 2458793  | 30589   |
| 60282 | 25476051 | 267485   | ND       | 2156840  | 31336   |
| 60283 | 14039290 | 2192596  | 58140    | 1837609  | 20890   |
| 60284 | 25195522 | 132731   | ND       | 1545653  | 14980   |
| 60285 | 2762203  | 68972    | ND       | 359903   | 5161    |
| 60286 | 6276353  | 130290   | ND       | 951193   | 8999    |

---

ND, not detected.

**Table S3.** Polysulfides detection at 14 days after culturing *S. commune* from the headspace air in each vial.

| Strain (IFM number)  | Peak area |          |          |          |          |
|----------------------|-----------|----------|----------|----------|----------|
|                      | DMDS      | MEDS     | DEDS     | DMTriS   | DMTetraS |
| 54711                |           |          |          |          |          |
| 54713                |           |          |          |          |          |
| 54722                |           |          |          |          |          |
| 55614                |           |          |          |          |          |
| 57137                |           |          |          |          |          |
| 58052                |           |          |          |          |          |
| 58318                | Detected  | Detected | Detected | Detected | Detected |
| 59347                |           |          |          |          |          |
| 59695                | Detected  |          |          | Detected | Detected |
| 60283                | Detected  |          |          | Detected |          |
| 60283                |           |          |          |          |          |
| Blank, not detected. |           |          |          |          |          |
